# Supplementary material
Source: Springer Nature journal article supplement (https://www.springermedizin.de/resource/supplementary/13550_2013_183_MOESM1_ESM.pdf/9687782)

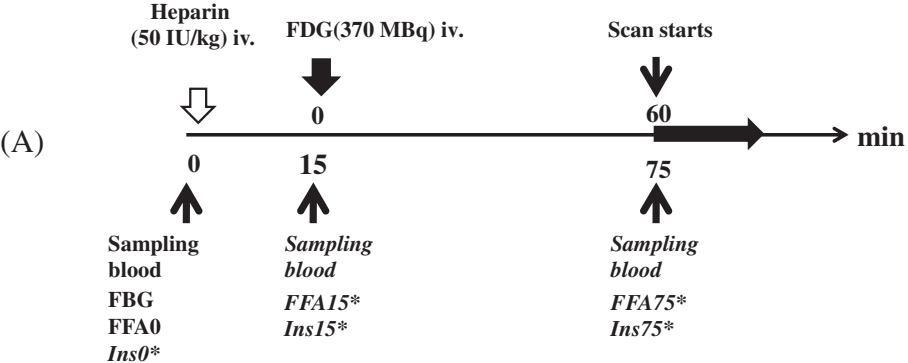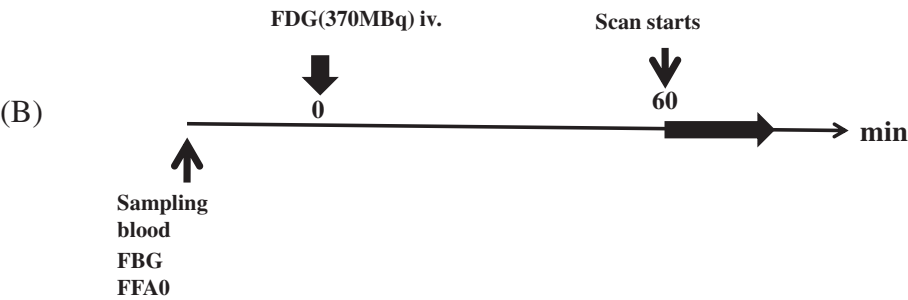

Supplement: MOESM1 [file 9687782]
